# Supplementary material
Source: publisher site journal article supplement (https://www.kjim.org/upload/media/kjim-2021-026-suppl3.pdf)
Supplement: Supplementary file 1 [file kjim-2021-026-suppl3.pdf]

**Supplementary Table 3. Masking (indoor space with other people) and hand-washing adherence after the COVID-19 outbreak**

| Variable             | Masking (public indoor places) |                                  |                   |         | Correct hand-washing practice |                                  |                   |         |
|----------------------|--------------------------------|----------------------------------|-------------------|---------|-------------------------------|----------------------------------|-------------------|---------|
|                      | Never or seldom <sup>a</sup>   | Always or generally <sup>a</sup> | OR (95% CI)       | p value | Never or seldom <sup>a</sup>  | Always or generally <sup>a</sup> | OR (95% CI)       | p value |
| <b>Sex</b>           |                                |                                  |                   |         |                               |                                  |                   |         |
| Male                 | 12                             | 228                              | 1.0               | -       | 19                            | 221                              | 1.0               | -       |
| Female               | 3                              | 361                              | 6.33 (1.77–22.69) | 0.002   | 5                             | 359                              | 6.17 (2.27–16.77) | < 0.001 |
| <b>Age group, yr</b> |                                |                                  |                   |         |                               |                                  |                   |         |
| 1–49                 | 10                             | 362                              | 1.0               | -       | 22                            | 350                              | 1.0               | -       |
| ≥ 50                 | 5                              | 227                              | 1.25 (0.42–3.71)  | 0.792   | 2                             | 230                              | 7.23 (1.68–31.03) | 0.001   |
| <b>Occupation</b>    |                                |                                  |                   |         |                               |                                  |                   |         |
| Public               | 12                             | 553                              | 1.0               | -       | 22                            | 543                              | 1.0               | -       |
| HCWs                 | 3                              | 36                               | 0.26 (0.07–0.96)  | 0.066   | 2                             | 37                               | 0.75 (0.17–3.31)  | 0.468   |

COVID-19, coronavirus disease 2019; OR, odds ratio; CI, confidence interval; HCW, health-care workers.

<sup>a</sup>Likert-type responses: “Never do,” “Seldom do,” “Generally do,” “Always do.”
